# Supplementary material for: Functional Analysis of Viable Circulating Tumor Cells from Triple-Negative Breast Cancer Patients Using TetherChip Technology
Source: MDPI journal article supplement (doi:10.3390/cells12151940), 2023-07-26
Supplement: s1 [file s1]

S1

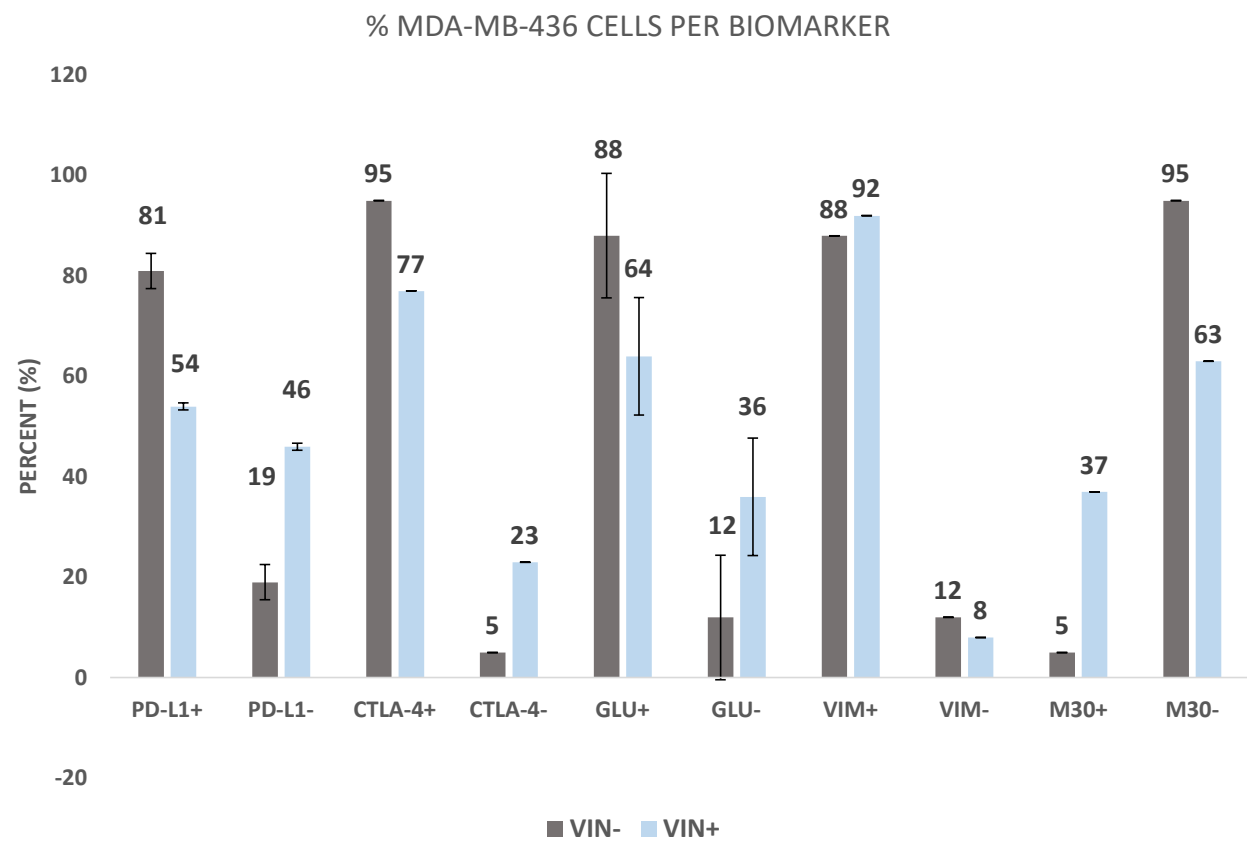

**Figure S1:** MDA-MB-436 cells in TetherChips. Percentage of MDA-MB-436 with the corresponding phenotypes before and after vinorelbine treatment (10  $\mu$ M) for 1 h. Data are shown as mean  $\pm$  SE.

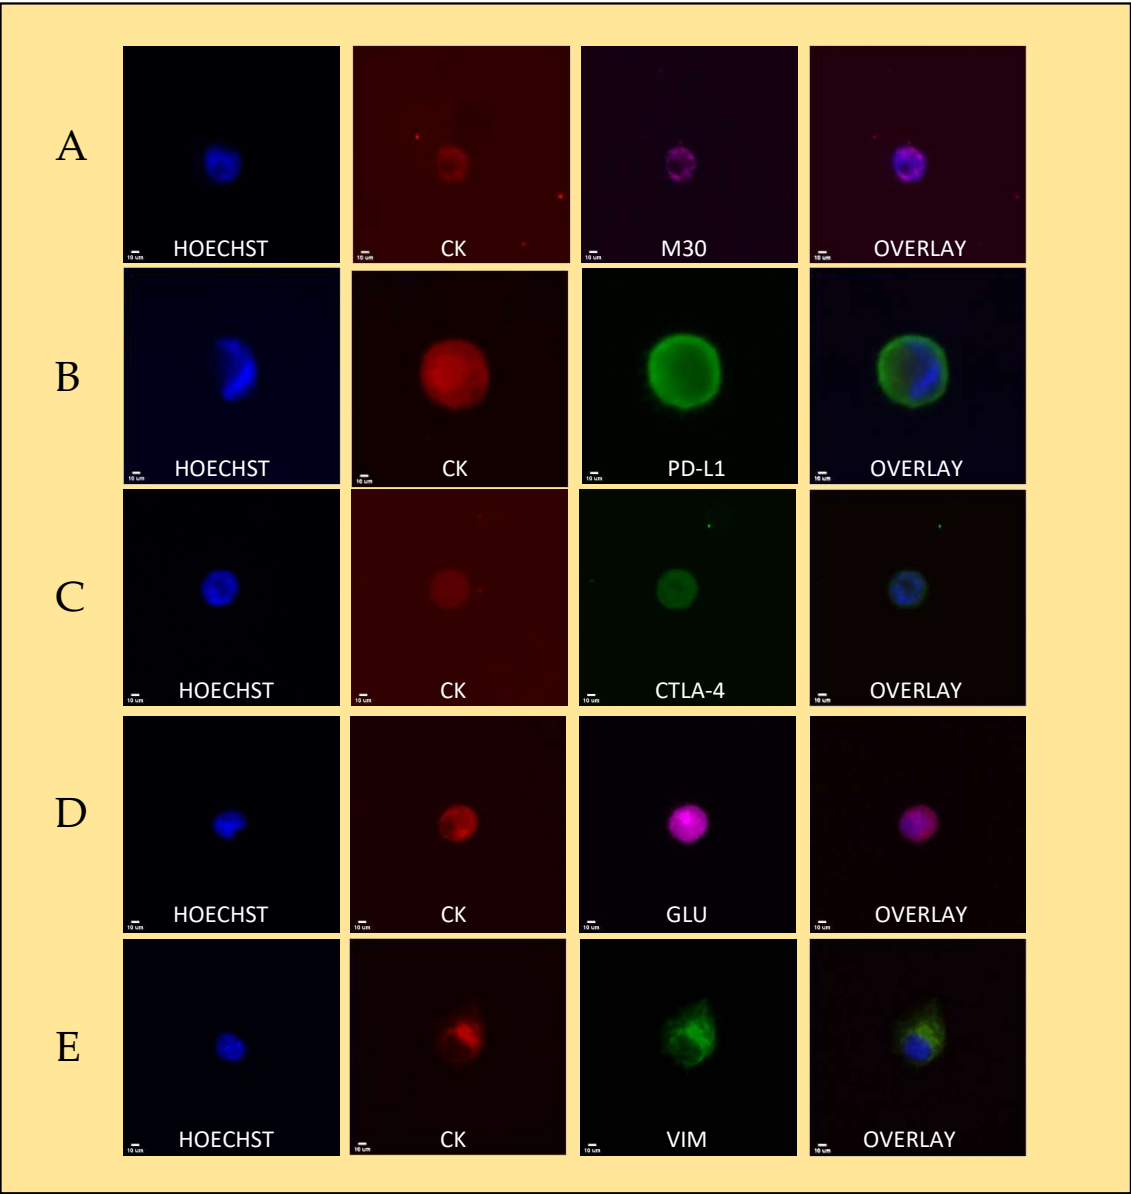

**Figure S2:** Expression of all the biomarkers in MDA-MB-436 cells. The first column represents nuclei stained with HOECHST; the second column represents cells expressing CK, the third cells expressing M30 CytoDeath, PD-L1, CTLA-4, GLU, and VIM; the fourth represents the overlay of the three channels. Representative panels of cells with (A) expression of M30 CytoDeath (apoptosis), (B) expression of PD-L1, (C) expression of CTLA-4, (D) expression of GLU, and (E) expression of VIM are shown. Micrographs were acquired from Vycap System. Controls were implemented adding 1000 cells in each well of the TetherChip. Scale bars = 10 µm.
